# Supplementary material for: Potential Effects of 25-Hydroxycholecalciferol on the Growth Performance, Blood Antioxidant Capacity, Intestinal Barrier Function and Microbiota in Broilers under Lipopolysaccharide Challenge
Source: MDPI journal article supplement (doi:10.3390/antiox11112094), 2022-10-24
Supplement: s1 [file s1]

---

*Supplementary Materials*

**Table S1.** Effects of 25OHD<sub>3</sub> supplementation on growth performance of broilers before LPS challenge.<sup>1</sup>

| <b>Item</b>                  | <b>CON</b> | <b>LPS</b> | <b>LPS + 25OHD<sub>3</sub></b> | <b>SEM</b> | <b><i>P</i>-value</b> |
|------------------------------|------------|------------|--------------------------------|------------|-----------------------|
| Initial body weight, g       | 48.69      | 48.55      | 48.19                          | 0.81       | 0.90                  |
| Final body weight, g         | 690.36     | 698.75     | 673.80                         | 19.07      | 0.65                  |
| Average daily gain, g        | 30.56      | 30.96      | 29.79                          | 1.00       | 0.71                  |
| Average daily feed intake, g | 43.19      | 43.32      | 41.30                          | 2.12       | 0.76                  |
| Feed:gain                    | 1.41       | 1.40       | 1.38                           | 0.04       | 0.92                  |

CON, control; LPS, lipopolysaccharide; LPS + 25OHD<sub>3</sub>, lipopolysaccharide + 25-hydroxycholecalciferol.<sup>1</sup>Data are present as means and SEM (*n* = 6).
